# Supplementary material
Source: PubMed Central journal article supplement (PMC3519166)
Supplement: supp_120256_case-liu-1-at.pdf [file supp_120256_case-liu-1-at.pdf]

| <b>Appendix 1: Features of postobstructive pulmonary edema cases associated with thyroid tumour (as supplied by the authors)</b> |                       |                                    |                    |                         |                                               |                           |                               |                        |                  |
|----------------------------------------------------------------------------------------------------------------------------------|-----------------------|------------------------------------|--------------------|-------------------------|-----------------------------------------------|---------------------------|-------------------------------|------------------------|------------------|
| <b>Type</b>                                                                                                                      | <b>Age (yrs), Sex</b> | <b>Etiology</b>                    | <b>Size</b>        | <b>Time to symptoms</b> | <b>Associated condition</b>                   | <b>Time to resolution</b> | <b>Fine needle aspiration</b> | <b>Treatment</b>       | <b>Reference</b> |
| I                                                                                                                                | 35, F                 | Multinodular goitre                | N/A                | On admission            | Pregnant 39 wk                                | 24 h                      | No                            | Thyroidectomy          | 1                |
| I                                                                                                                                | 70, F                 | Metastatic squamous cell carcinoma | 3.0 × 4.0 cm       | On admission            | Primary lung cancer                           | 36 h                      | No                            | Surgical exploration   | 2                |
| I                                                                                                                                | 35, F                 | Macrofollicular goitre             | N/A                | On admission            | Pregnant 38 wk                                | Hours                     | Yes                           | Subtotal thyroidectomy | 3                |
| I                                                                                                                                | 51, F                 | Degenerated colloid cyst           | N/A                | 1 day                   | N/A                                           | 24 h                      | No                            | Total thyroidectomy    | 4                |
| II                                                                                                                               | 50, M                 | Papillary carcinoma                | 13.7 cm            | N/A                     | After resection of mediastinum thyroid goitre | 24h                       | No                            | Intubation, BiPAP      | 5                |
| I                                                                                                                                | 63, F                 | Multinodular goitre                | 4.0 × 9.0 cm       | On admission            | N/A                                           | 24 h                      | No                            | Thyroidectomy          | 6                |
| I                                                                                                                                | 50, F                 | Papillary carcinoma                | 7.0 × 4.0 × 3.0 cm | 17 minutes              | N/A                                           | 29 h                      | Yes                           | Subtotal thyroidectomy | Present case     |

\* N/A indicates not available or not applicable; BiPAP = bi-level positive airway pressure

#### References

1. Stradling JR, Bolton P. Upper airways obstruction as cause of pulmonary oedema. *Lancet* 1982;1:1353-4.
2. Leatherman JW, Schwartz S. Pulmonary edema due to upper airway obstruction. *South Med J* 1983;76:1058-60.
3. Lagler U, Russi E. Upper airway obstruction as a cause of pulmonary edema during late pregnancy. *Am J Obstet Gynecol* 1987;156:643-4.
4. Koh MS, Hsu AA, Eng P. Negative pressure pulmonary oedema in the medical intensive care unit. *Intensive Care Med* 2003;29:1601-4.
5. Ikeda H, Asato R, Chin K, et al. Negative-pressure pulmonary edema after resection of mediastinum thyroid goiter. *Acta Otolaryngol* 2006;126:886-8.
6. Schaffer SA, Manji RA, Kirkpatrick I, et al. Negative pressure pulmonary edema in the coronary care unit. *Can J Cardiol* 2008;24:e58-9.
